# Supplementary material
Source: PubMed Central journal article supplement (PMC10975863)
Supplement: NIHMS1973875-supplement-supplementary_Fig_1.pdf [file NIHMS1973875-supplement-supplementary_Fig_1.pdf]

---

**Supplementary information**

---

**Y chromosome loss in cancer drives growth  
by evasion of adaptive immunity**

---

In the format provided by the  
authors and unedited

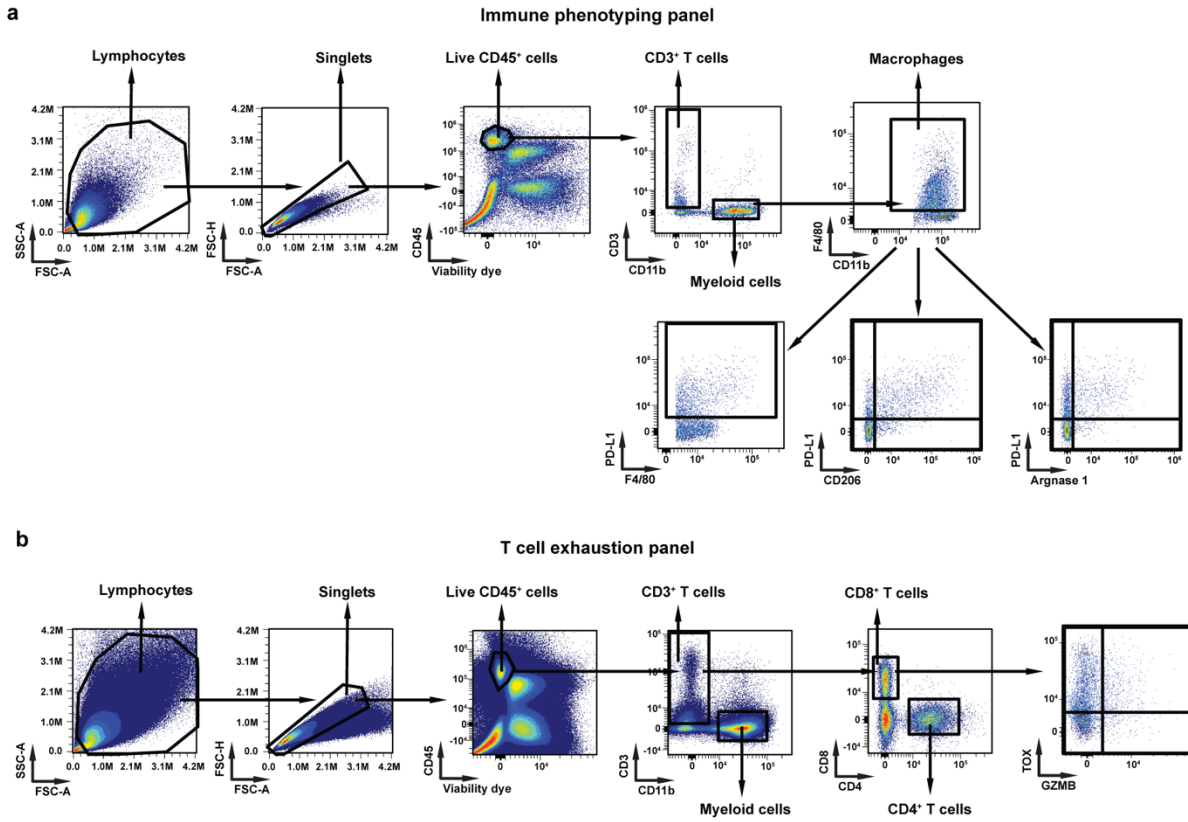

**Supplementary Figure 1 | Spectral flow cytometry gating strategies.** Diagram of gating strategies for flow cytometry analyses using the Immune phenotyping (see Figure 3) and T cell exhaustion (see Figure 5) antibody panels.
